# Supplementary material for: Silver loaded biodegradable carboxymethyl chitin films with long-lasting antibacterial activity for infected wound healing
Source: Royal Society of Chemistry journal article supplement (doi:10.1039/d2bm01046a), 2022-01-01
Supplement: d2bm01046a1.pdf [file d2bm01046a1.pdf]

## Supplementary information

### Silver loaded biodegradable carboxymethyl chitin films with long-lasting antibacterial activity for infected wound healing

Siyao Lv, Xulin Jiang\*

*Key Laboratory of Biomedical Polymers of Ministry of Education & Department of Chemistry, Wuhan University, Wuhan 430072, P.R. China*

\*Corresponding author: Prof. Dr. Xulin Jiang, Key Laboratory of Biomedical Polymers of Ministry of Education & Department of Chemistry, Wuhan University, 299 Bayi Road, Wuhan 430072, China. Tel.: +86-18062071096; Fax: +86-27-68754509. E-mail address: [xljiang@whu.edu.cn](mailto:xljiang@whu.edu.cn).

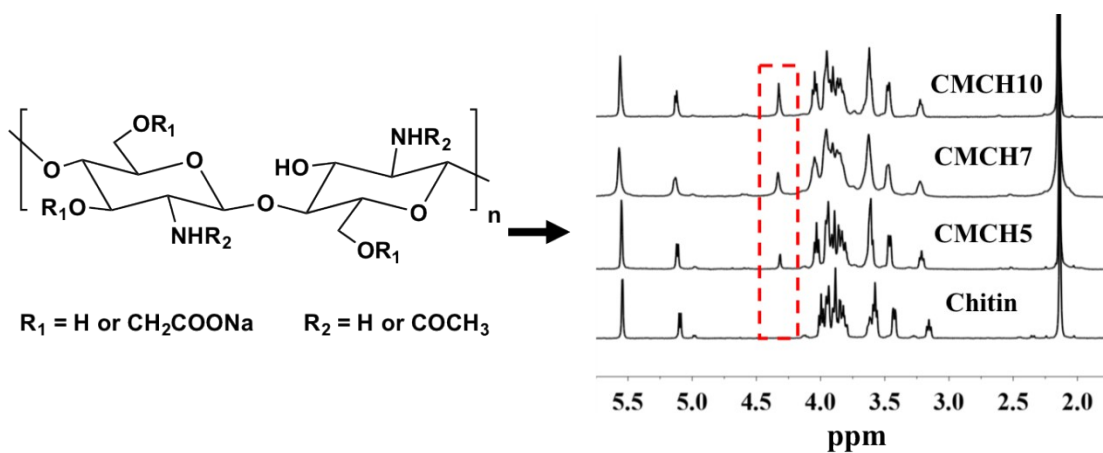

Fig. S1 <sup>1</sup>H NMR spectra of CMCH and Chitin in 20% DCl in D<sub>2</sub>O.

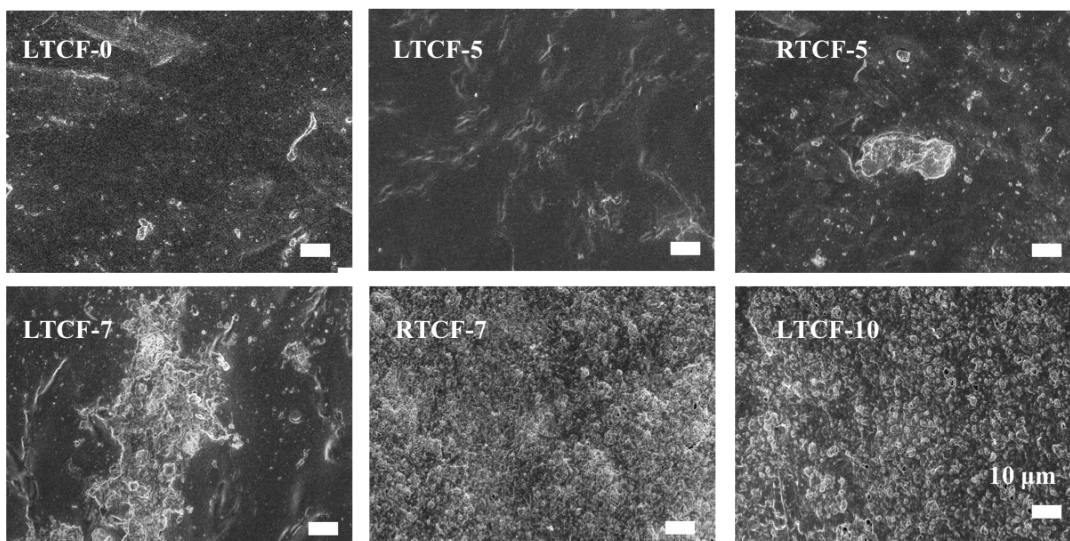

Fig. S2 SEM images of carboxymethyl chitin films.

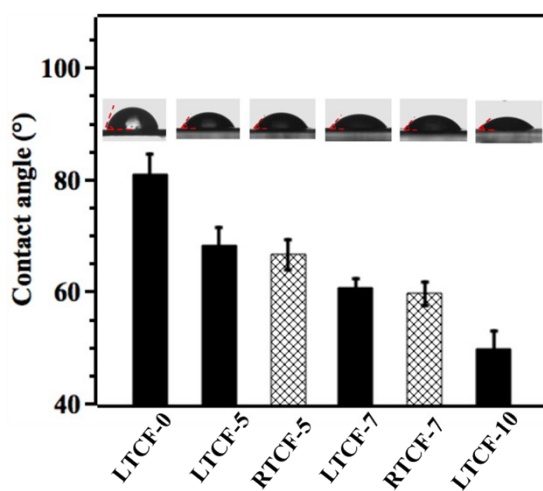

Fig. S3 The contact angles of carboxymethyl chitin films.

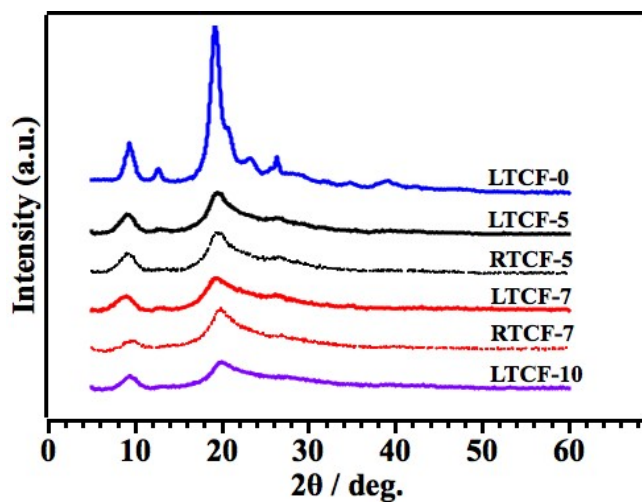

Fig. S4 The XRD spectra of carboxymethyl chitin films.

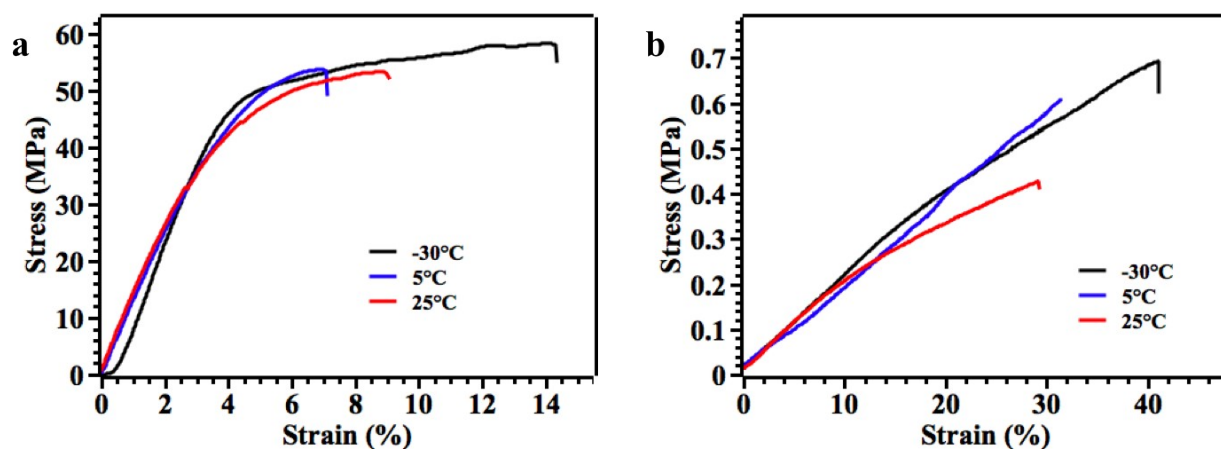

Fig. S5 The tensile stress-strain curves of CMCH5 films prepared under different regeneration temperatures (-30°C, 5°C and 20°C) in (a) dry state and (b) wet state.

Table S1 Comparison of tensile strength between the LTCF-5 and biodegradable dressings reported in the past three years and commercially available dressings

| Sample                                               | Tensile strength |
|------------------------------------------------------|------------------|
| LTCF-5                                               | ~56 MPa          |
| HA-CC <sup>1</sup>                                   | ~14 MPa          |
| CTS/GEL/10 v.% BA <sup>2</sup>                       | ~35 MPa          |
| Agar-LBG <sup>3</sup>                                | ~45 MPa          |
| Ch/HA <sup>4</sup>                                   | ~27MPa           |
| PC4 <sup>5</sup>                                     | ~9.37 MPa        |
| N-SuC <sup>6</sup>                                   | ~10 MPa          |
| G-BSA-AG26 <sup>7</sup>                              | ~4 MPa           |
| VCF2 <sup>8</sup>                                    | ~24MPa           |
| Resolut@LT regenerative membrane (Gore) <sup>9</sup> | ~11.7 MPa        |
| Kaltostat@ (ConvaTec) <sup>9</sup>                   | ~1.3 MPa         |

Legend for videos

Supplementary video 1. The foldability of carboxymethyl chitin film.

## References

- 1 S. Huang, H.J. Chen, Y. P. Deng, X.-h. You, Q.-h. Fang and M. Lin, *Polym. Degrad. Stabil.*, 2020, **181**, 109349.
- 2 B. Evranos, D. Aycan and N. Alemdar, *Carbohydr. Polym.*, 2019, **222**, 115007.
- 3 N. E. Akkaya, C. Ergun, A. Saygun, N. Yesilcubuk, N. Akel-Sadoglu, I.H. Kavakli, H.S. Turkmen and H. Catalgil-Giz, *Int. J. Biol. Macromol.*, 2020, **155**, 430-438.
- 4 M .A. Hassan, T. M. Tamer, K. Valachova, A. M. Omer, M. El-Shafeey, M. S. Mohy Eldin and L. Soltes, *Int. J. Biol. Macromol.*, 2021, **166**, 18-31.
- 5 V. Muthulakshmi and G.R. Rajarajeswari, *New J. Chem.*, 2021, **45**(38), 17918-17929.
- 6 N. T. T. Thao, H. Wijerathna, R. S. Kumar, D. Choi, S. H. S. Dananjaya and A. P. Attanayake, *Int. J. Biol. Macromol.*, 2021, **193**, 1823-1834.
- 7 F. Zhang, H. Yang, Y. Yang, H. Wang, X. Li and X. Wu, *Chem. Eng. J.*, 2021, **417**, 129145.
- 8 R. Kausar, A. U. Khan, B. Jamil, Y. Shahzad and I. Ul-Haq, *Carbohydr. Polym.*, 2021, **256**, 117565.
- 9 J.J. Elsner and M. Zilberman, *J. Tissue Viability*, 2010, **19**(2), 54-66.
